# Supplementary material
Source: PubMed Central journal article supplement (PMC9994582)
Supplement: NIHMS1874993-supplement-Supplementary.pdf [file NIHMS1874993-supplement-Supplementary.pdf]

## Online Supplemental Material

**sTable 1.** Associations of product type, flavor, sociodemographic factors, and survey type with willingness to use oral nicotine product

**sTable 1. Associations of product type, flavor, sociodemographic factors, and survey type with willingness to use oral nicotine products**

| Regressors                               | Model 1 <sup>a,b</sup> |                    | Model 2 <sup>a,b</sup> |                    |
|------------------------------------------|------------------------|--------------------|------------------------|--------------------|
|                                          | Adjusted OR (95%CI)    | P-value            | Adjusted OR (95%CI)    | P-value            |
| <b><i>Product Type</i></b>               |                        |                    |                        |                    |
| Traditional Smokeless Tobacco            | REF                    | --                 | REF                    | --                 |
| Nonmedicinal Nicotine gum                | 1.90 (1.69, 2.14)      | <.001 <sup>g</sup> | 1.89 (1.68, 2.13)      | <.001 <sup>g</sup> |
| Nicotine pouches                         | 1.26 (1.14, 1.41)      | <.001 <sup>g</sup> | 1.26 (1.13, 1.41)      | <.001 <sup>g</sup> |
| Nonmedicinal Nicotine lozenges           | 1.35 (1.23, 1.50)      | <.001 <sup>g</sup> | 1.35 (1.22, 1.49)      | <.001 <sup>g</sup> |
| Nicotine gummies <sup>c</sup>            | 1.50 (1.35, 1.67)      | <.001 <sup>g</sup> | Not included           | --                 |
| <b><i>Flavor</i></b>                     |                        |                    |                        |                    |
| Fruit                                    | Not included           | --                 | REF                    | --                 |
| Mint                                     | Not included           | --                 | 1.12 (1.03, 1.22)      | .008 <sup>g</sup>  |
| <b><i>High School Grade</i></b>          |                        |                    |                        |                    |
| 9 <sup>th</sup> grade                    | REF                    | --                 | REF                    | --                 |
| 10 <sup>th</sup> grade                   | 0.74 (0.57, 0.96)      | .01 <sup>g</sup>   | 0.74 (0.56, 0.94)      | .01 <sup>g</sup>   |
| <b><i>Race/Ethnicity</i></b>             |                        |                    |                        |                    |
| Hispanic                                 | 1.31 (0.91, 1.89)      | .15                | 1.34 (0.93, 1.92)      | .11                |
| Asian                                    | 0.95 (0.67, 1.36)      | .77                | 0.96 (0.67, 1.36)      | .80                |
| Another Race/Ethnicity <sup>d</sup>      | REF                    | --                 | REF                    | --                 |
| <b><i>Highest Parental Education</i></b> |                        |                    |                        |                    |
| <High school                             | 1.28 (0.74, 2.22)      | .37                | 1.35 (0.78, 2.34)      | .28                |
| High school graduate                     | 1.19 (0.73, 1.95)      | .48                | 1.18 (0.73, 1.93)      | .48                |
| Some college or college degree           | REF                    | --                 | REF                    | --                 |
| Advanced degree                          | 1.03 (0.75, 1.41)      | .86                | 1.02 (0.75, 1.39)      | .91                |
| Don't know                               | 0.87 (0.57, 1.33)      | .52                | 0.95 (0.63, 1.44)      | .70                |
| <b><i>Family Finances</i></b>            |                        |                    |                        |                    |
| Struggling or in poverty                 | 1.10 (0.51, 2.35)      | .81                | 1.13 (0.52, 2.46)      | .75                |
| Well-off, average, or varied             | REF                    | --                 | REF                    | --                 |
| <b><i>Gender Identity</i></b>            |                        |                    |                        |                    |
| Male/masculine                           | REF                    | --                 | REF                    | --                 |
| Female/feminine                          | 1.35 (1.03, 1.80)      | .02 <sup>g</sup>   | 1.33 (1.03, 1.80)      | .02 <sup>g</sup>   |
| Transgender or non-binary <sup>e</sup>   | 1.65 (1.19, 2.97)      | .003 <sup>g</sup>  | 1.67 (1.19, 2.96)      | .005 <sup>g</sup>  |
| <b><i>Sexual Identity</i></b>            |                        |                    |                        |                    |
| Heterosexual                             | REF                    | --                 | REF                    | --                 |
| LGB+ <sup>f</sup>                        | 1.90 (1.31, 2.76)      | <.001 <sup>g</sup> | 1.89 (1.30, 2.76)      | .001 <sup>g</sup>  |
| <b><i>Survey Type</i></b>                |                        |                    |                        |                    |
| In-class room survey                     | REF                    | --                 | REF                    | --                 |
| Online survey                            | 1.27 (0.88, 1.96)      | .08                | 1.76 (1.01, 2.54)      | .04                |

*Note.* Abbreviations: OR, odds ratio; 95%CI, 95% confidence interval. <sup>a</sup> Analytic sample N=1,289 (Tobacco non-users who completed the experimental paradigm). <sup>b</sup> Binary logistic mixed random effect-repeated measures regression modeling (outcome: Willingness to use [Yes/No]) includes all regressors simultaneously. School-level clustering effects were adjusted using the complex analysis function. <sup>c</sup> Nicotine gummies product type includes candy flavor only and therefore Model 1 did not include flavor variable. In Model 2 which included the flavor variable, data observations for nicotine gummies were excluded. <sup>d</sup> The "Another Race/Ethnicity" race/ethnicity category includes American Indian/Alaska Native, Black/African American, Native Hawaiian/Pacific Islander, White, multiethnic/multiracial, and another. <sup>e</sup> The "Transgender or non-binary" category includes transgender male, transgender female, gender variant/non-binary, or another categories. <sup>f</sup> The "LGB+" category includes lesbian, gay, bisexual, asexual, queer, pansexual, and questioning. <sup>g</sup> P-values were statistically significant after Benjamini-Hochberg corrections for multiple testing to control false-discovery rate at .05 (based on 2-tailed corrected p-value).
